# Supplementary material for: Fungal lung disease
Source: PubMed Central journal article supplement — Eur Respir J. 2024 Nov 28;64(5):2400803. doi: 10.1183/13993003.00803-2024 (PMC11602666; doi:10.1183/13993003.00803-2024), 2024-11-28

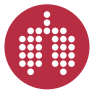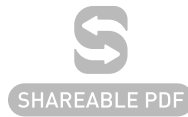

# Fungal lung disease

Tavleen Kaur Jaggi, Ritesh Agarwal, Pei Yee Tiew, Anand Shah <sup>ID</sup>, Emily C. Lydon, Chadi A. Hage, Grant W. Waterer, Charles R. Langelier, Laurence Delhaes <sup>ID</sup> and Sanjay H. Chotirmall <sup>ID</sup>

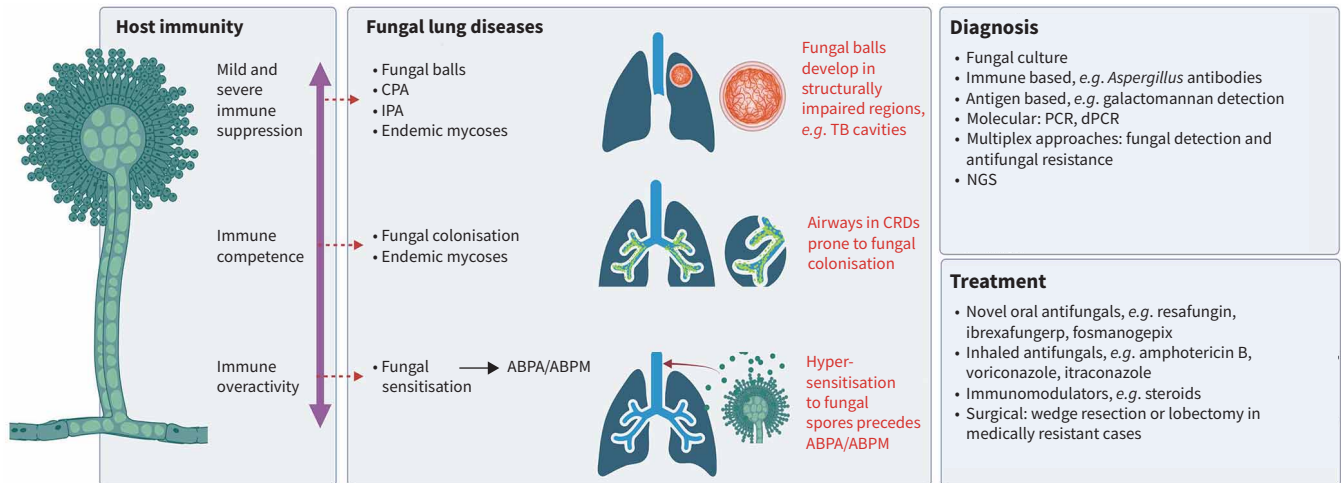

**GRAPHICAL ABSTRACT** Relationship of fungal lung disease with host immunity, diagnosis and treatment options. CPA: chronic pulmonary aspergillosis; IPA: invasive pulmonary aspergillosis; ABPA: allergic bronchopulmonary aspergillosis; ABPM: allergic bronchopulmonary mycosis; TB: tuberculosis; CRD: chronic respiratory diseases; dPCR: digital PCR; NGS: next-generation sequencing. Figure created with Biorender.com.

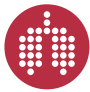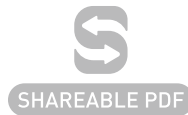

# Fungal lung disease

Tavleen Kaur Jaggi<sup>1</sup>, Ritesh Agarwal<sup>2</sup>, Pei Yee Tiew<sup>1,3,4</sup>, Anand Shah<sup>5,6</sup>, Emily C. Lydon<sup>7</sup>, Chadi A. Hage<sup>8,9</sup>, Grant W. Waterer<sup>10</sup>, Charles R. Langelier<sup>7,11</sup>, Laurence Delhaes<sup>12,13</sup> and Sanjay H. Chotirmall<sup>1,14</sup>

<sup>1</sup>Lee Kong Chian School of Medicine, Nanyang Technological University, Singapore, Singapore. <sup>2</sup>Department of Pulmonary Medicine, Postgraduate Institute of Medical Education and Research, Chandigarh, India. <sup>3</sup>Department of Respiratory and Critical Care Medicine, Singapore General Hospital, Singapore, Singapore. <sup>4</sup>Duke-NUS Medical School, Singapore, Singapore. <sup>5</sup>Department of Respiratory Medicine, Royal Brompton and Harefield Hospitals, Guy's and St Thomas' NHS Foundation Trust, London, UK. <sup>6</sup>MRC Centre of Global Infectious Disease Analysis, School of Public Health, Imperial College London, London, UK. <sup>7</sup>Division of Infectious Diseases, Department of Medicine, University of California San Francisco, San Francisco, CA, USA. <sup>8</sup>Pulmonary, Allergy and Critical Care Medicine, University of Pittsburgh, Pittsburgh, PA, USA. <sup>9</sup>Lung Transplant, University of Pittsburgh Medical Center, Pittsburgh, PA, USA. <sup>10</sup>University of Western Australia, Royal Perth Hospital, Perth, Australia. <sup>11</sup>Chan Zuckerberg Biohub, San Francisco, CA, USA. <sup>12</sup>Univ. Bordeaux, Centre de Recherche Cardio-Thoracique de Bordeaux, U1045, Bordeaux, France. <sup>13</sup>CHU de Bordeaux: Laboratoire de Parasitologie-Mycologie, CNR des Aspergilloses Chroniques, Univ. Bordeaux, FHU ACRONIM, Bordeaux, France. <sup>14</sup>Department of Respiratory and Critical Care Medicine, Tan Tock Seng Hospital, Singapore, Singapore.

Corresponding author: Sanjay H. Chotirmall ([schotirmall@ntu.edu.sg](mailto:schotirmall@ntu.edu.sg))

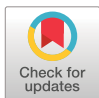

Shareable abstract (@ERSpublications)

**Fungal lung disease occurs independently or complicates underlying lung disease. Type and severity are determined by host immunity, geography and environment. Next-generation sequencing is revolutionising diagnostic and treatment strategies.** <https://bit.ly/3TFwAJ3>

**Cite this article as:** Jaggi TK, Agarwal R, Tiew PY, *et al.* Fungal lung disease. *Eur Respir J* 2024; 64: 2400803 [DOI: 10.1183/13993003.00803-2024].

This extracted version can be shared freely online.

Copyright ©The authors 2024.

This version is distributed under the terms of the Creative Commons Attribution Non-Commercial Licence 4.0. For commercial reproduction rights and permissions contact [permissions@ersnet.org](mailto:permissions@ersnet.org)

Received: 28 April 2024  
Accepted: 13 Sept 2024

## Abstract

Fungal lung disease encompasses a wide spectrum of organisms and associated clinical conditions, presenting a significant global health challenge. The type and severity of disease are determined by underlying host immunity and infecting fungal strain. The most common group of diseases are associated with the filamentous fungus *Aspergillus* species and include allergic bronchopulmonary aspergillosis, sensitisation, aspergilloma and chronic and invasive pulmonary aspergillosis. Fungal lung disease remains epidemiologically heterogenous and is influenced by geography, environment and host comorbidities. Diagnostic modalities continue to evolve and now include novel molecular assays and biomarkers; however, persisting challenges include achieving rapid and accurate diagnosis, particularly in resource-limited settings, and in differentiating fungal infection from other pulmonary conditions. Treatment strategies for fungal lung diseases rely mainly on antifungal agents but the emergence of drug-resistant strains poses a substantial global threat and adds complexity to existing therapeutic challenges. Emerging antifungal agents and increasing insight into the lung mycobiome may offer fresh and personalised approaches to diagnosis and treatment. Innovative methodologies are required to mitigate drug resistance and the adverse effects of treatment. This state-of-the-art review describes the current landscape of fungal lung disease, highlighting key clinical insights, current challenges and emerging approaches for its diagnosis and treatment.

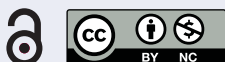

Supplement: ERJ-00803-2024.Shareable.pdf [file ERJ-00803-2024.Shareable.pdf]
